# Supplementary material for: Nerocila species (Crustacea, Isopoda, Cymothoidae) from Indian marine fishes
Source: PubMed Central journal article supplement — Parasitol Res. 2013 Jan 17;112(3):1273–86. doi: 10.1007/s00436-012-3263-5 (PMC3580147; doi:10.1007/s00436-012-3263-5), 2013-01-17
Supplement: 436_2012_3263_MOESM1_ESM.pdf [file 436_2012_3263_MOESM1_ESM.pdf]

A checklist of the nominal *Nerocila* species until now reported from Indian marine fishes: hosts, localities and records from India.

| <i>Nerocila</i> species     | Host species                                                                                              | Host family                     | Locality                                            | Records                                       |
|-----------------------------|-----------------------------------------------------------------------------------------------------------|---------------------------------|-----------------------------------------------------|-----------------------------------------------|
| <i>Nerocila arres</i>       | <i>Nemipterus japonicus</i>                                                                               | Nemipteridae                    | Nagappatinam                                        | <b>Present study</b>                          |
| <i>Nerocila depressa</i>    | <i>Sardinella gibbosa</i>                                                                                 | Clupeidae                       | Pazhaiyar                                           | <b>Present study</b>                          |
| <i>Nerocila exocoeti</i>    | <i>Exocoetus brachypterus</i><br>(= <i>Parexocoetus brachypterus</i> )                                    | Exocoetidae                     | Travancore                                          | Pillai (1954)                                 |
| “                           | <i>Exocoetus volitans</i>                                                                                 | Exocoetidae                     | Parangipettai                                       | <b>Present study</b>                          |
| <i>Nerocila longispina</i>  | Not identified                                                                                            | -                               | Malabar coast                                       | Miers (1880)                                  |
| “                           | <i>Therapon puta</i> ,<br><i>Otholites ruber</i><br>(= <i>Therapon puta</i> ,<br><i>Otolithes ruber</i> ) | Terapontidae,<br>Sciaenidae     | Vedaranyam,<br>Southeastern<br>coasts of India      | Rameshkumar et al.<br>(2011)                  |
| “                           | <i>Therapon puta</i> ,<br><i>Otolithes ruber</i>                                                          | Terapontidae,<br>Sciaenidae     | Vedaranyam,<br>Southeastern<br>coasts of India      | <b>Present study</b>                          |
| <i>Nerocila loveni</i>      | <i>Eubleekeria splendens</i>                                                                              | Leiognathidae                   | Nagappatinam,<br>Southeastern<br>coasts of India    | <b>Present study</b>                          |
| <i>Nerocila madrasensis</i> | <i>Hemiramphus</i> sp.                                                                                    | Hemiramphidae                   | Madras (Tamil<br>Nadu)                              | Ramakrishna and<br>Venkata Ramaniah<br>(1978) |
| <i>Nerocila pigmentata</i>  | <i>Opisthopterus turtoor</i><br>(= <i>Opisthopterus tardoore</i> )                                        | Clupeidae                       | Bombay coast                                        | Bal and Joshi, 1959                           |
| <i>Nerocila pigmenta</i>    | Not specified                                                                                             | -                               | Not specified                                       | Joshi and Bal 1960                            |
| <i>Nerocila pigmentata</i>  | <i>Nematalosa nasus</i>                                                                                   | Clupeidae                       | Parangipettai,<br>Southeast<br>coast of India       | Parimala 1984                                 |
| “                           | <i>Amblygaster sirm</i>                                                                                   | Clupeidae                       | Parangipettai,<br>Southeast<br>coast of India       | Veerapan and<br>Ramanathan 1997               |
| <i>Nerocila phaiopleura</i> | <i>Ilisha melastoma</i> ,<br><i>Formio niger</i> (= <i>Parastromateus niger</i> )                         | Pristigasteridae,<br>Carangidae | Kakinada,<br>Tamil Nadu,<br>Bay of Bengal,<br>India | Bruce and Harrison-<br>Nelson 1988            |
| “                           | <i>Chirocentrus dorab</i> ,                                                                               | Chirocentridae,                 | Parangipettai<br>coast                              | Veerapan and<br>Ravichandran, 2000            |

|   |                                                                     |                |                     |                                   |
|---|---------------------------------------------------------------------|----------------|---------------------|-----------------------------------|
|   | <i>Sardinella longiceps</i> ,                                       | Clupeidae      |                     |                                   |
|   | <i>S. sindensis</i> ,                                               | Clupeidae      |                     |                                   |
|   | <i>S. brachysoma</i> ,                                              | Clupeidae      |                     |                                   |
|   | <i>Dussumieria acuta</i> ,                                          | Clupeidae      |                     |                                   |
|   | <i>Thyrssa dussumieri</i> (=<br><i>Thryssa dussumieri</i> ),        |                |                     |                                   |
|   | <i>T. mystax</i> ,                                                  | Engraulidae    |                     |                                   |
|   | <i>Scomberomorus guttatus</i>                                       | Engraulidae    |                     |                                   |
|   |                                                                     | Scombridae     |                     |                                   |
| “ | <i>Chirocentrus dorab</i>                                           | Chirocentridae | Parangipettai coast | Ravichandran <i>et al.</i> (2001) |
| “ | <i>Stolephorus commersonii</i> (= <i>Stolephorus commersonnii</i> ) | Engraulidae    | Parangipettai coast | Rajkumar <i>et al.</i> (2007)     |
| “ | <i>Arius jella</i>                                                  | Ariidae        | Parangipettai coast | Rajkumar <i>et al.</i> (2008)     |
| “ | <i>Carangoides malabaricus</i>                                      | Carangidae     | Parangipettai       | <b>Present study</b>              |
| “ | <i>Carangoides</i> sp.                                              | Carangidae     | “                   | “                                 |
| “ | <i>Chirocentrus dorab</i>                                           | Chirocentridae | “                   | “                                 |
| “ | <i>Dussumieria acuta</i>                                            | Clupeidae      | “                   | “                                 |
| “ | <i>Gazza minuta</i>                                                 | Leiognathidae  | “                   | “                                 |
| “ | <i>L. splendens</i>                                                 | Leiognathidae  | “                   | “                                 |
| “ | <i>Rastrelliger kanakurta</i>                                       | Scombridae     | “                   | “                                 |
| “ | <i>S. longiceps</i>                                                 | Clupeidae      | “                   | “                                 |
| “ | <i>S. gibbosa</i>                                                   | “              | “                   | “                                 |

|                                     |                                                                            |                             |                                                                   |                                        |
|-------------------------------------|----------------------------------------------------------------------------|-----------------------------|-------------------------------------------------------------------|----------------------------------------|
| “                                   | <i>Selaroides leptolepis</i>                                               | Carangidae                  | “                                                                 | “                                      |
| “                                   | <i>Sphyraena jello</i>                                                     | Sphyraenidae                | “                                                                 | “                                      |
| “                                   | <i>Tenualosa ilisha</i>                                                    | Clupeidae                   | “                                                                 | “                                      |
| “                                   | <i>Thryssa mystax</i>                                                      | Engraulidae                 | “                                                                 | “                                      |
| <b><i>Nerocila phaeopleura</i></b>  | <i>Histiophorus gladius</i><br>(= <i>Istiophorus platypterus</i> )         | Istiophoridae               | Bay of Bengal                                                     | Barnard 1936                           |
| “                                   | <i>Histiophorus gladius</i><br>(= <i>Istiophorus platypterus</i> )         | Istiophoridae               | Madras                                                            | Ramakrishna and Venkata Ramaniah, 1978 |
| “                                   | <i>Chirocentrus dorab</i>                                                  | Chirocentridae              | Parangipettai coast,<br>Mudasalodai,<br>Annankovil,<br>Pudupettai | Ravichandran and Ramesh Kumar 2004     |
| “                                   | <i>Stolephorus commersonii</i><br>(= <i>Stolephorus commersonnii</i> )     | Engraulidae                 | Paragipettai coast, India                                         | Rajkumar and Perumal 2004              |
| “                                   | <i>Rastrelliger kanagurta</i>                                              | Scombridae                  | Parangipettai,<br>Southeast coast of India                        | Rameshkumar and Ravichandran 2010      |
| <b><i>Nerocila poruvae</i></b>      | <i>Trichiurus lepturus</i> , <i>Thryssa mystax</i>                         | Trichiuridae<br>Engraulidae | Vedaranyam,<br>Southeastern coast of India                        | Rameshkumar et al. 2011                |
| “                                   | <i>Trichiurus lepturus</i> , <i>Thryssa mystax</i>                         | Trichiuridae<br>Engraulidae | Vedaranyam,<br>Southeastern coast of India                        | <b>Present study</b>                   |
| <b><i>Nerocila priacanthusi</i></b> | <i>Priacanthus hamrur</i>                                                  | Priacanthidae               | Waltair coast,<br>Andhra Pradesh, India                           | Kumari et al. 1987                     |
| <b><i>Nerocila pulicatensis</i></b> | <i>Plotosus canius</i> ,<br><i>Mystus gulio</i>                            | Plotosidae,<br>Bagridae     | Karimanal shores of the Pulicat Lake                              | Jayadev Babu and Sanjeeva Raj 1984     |
| <b><i>Nerocila recurvispina</i></b> | Not identified                                                             | -                           | Calcutta                                                          | Schioedte and Meinert 1881             |
| <b><i>Nerocila serra</i></b>        | <i>Arius sagor</i> (= <i>Hexanematichthys sagor</i> ),<br><i>Hydrophis</i> | Ariidae<br><br>Reptilia     | Off Devi River, Orissa coast,<br>Vizagapatam                      | Barnard 1936                           |

|                                 |                                                            |                           |                                               |                                      |
|---------------------------------|------------------------------------------------------------|---------------------------|-----------------------------------------------|--------------------------------------|
|                                 | <i>obscurus</i> (Sea snake)                                | (Sea Snake)               | cost, Canjam coast (Orissa)                   |                                      |
| “                               | On several species of shoal fishes                         | -                         | Travancore                                    | Pillai (1954)                        |
| “                               | <i>Arius maculatus</i>                                     | Ariidae                   | Nagappatinam                                  | <b>Present study</b>                 |
| <b><i>Nerocila sigani</i></b>   | <i>Formio niger</i> (= <i>Parastromateus niger</i> )       | Carangidae                | Tamil Nadu, India, Bay of Bengal              | Bruce and Harrison-Nelson 1988       |
| “                               | Not identified                                             | -                         | Gujurat, India                                | Kensley 2001                         |
| “                               | <i>Siganus oramin</i>                                      | Siganidae                 | Mudasalodai                                   | <b>Present study</b>                 |
| <b><i>Nerocila sundaica</i></b> | Not identified                                             | -                         | Off Godavari (Sacraments mouth), Ganjam coast | Barnard 1936                         |
| “                               | <i>Otolithus ruber</i> (= <i>Otolithes ruber</i> ),        | Sciaenidae                | West coast of India                           | Chidambaram and Devidas Menon (1945) |
|                                 | <i>Therapon jarbua</i> (= <i>Therapon jarbua</i> ),        | Terapontidae              |                                               |                                      |
|                                 | <i>Engraulis mystax</i> (= <i>Thryssa mystax</i> ),        |                           |                                               |                                      |
|                                 | <i>Serranus gilberti</i> (= <i>Epinephelus quoyanus</i> ), | Engraulidae<br>Serranidae |                                               |                                      |
|                                 | <i>Pellona indica</i> ( <i>Ilisha melastoma</i> ),         | Pristigasteridae          |                                               |                                      |
|                                 | <i>Sardinella fimbriata</i>                                | Clupeidae                 |                                               |                                      |
| “                               | <i>C. malabaricus</i>                                      | Carangidae                | Nagappatinam                                  | <b>Present study</b>                 |
| “                               | <i>Ilisha melastoma</i>                                    | Pristigasteridae          | “                                             | “                                    |
| “                               | <i>O.ruber</i>                                             | Sciaenidae                | “                                             | “                                    |
| “                               | <i>S. leptolepis</i>                                       | Carangidae                | “                                             | “                                    |

|                            |                                                                        |                  |                                                  |                                         |
|----------------------------|------------------------------------------------------------------------|------------------|--------------------------------------------------|-----------------------------------------|
| “                          | <i>T. puta</i>                                                         | Terapontidae     | “                                                | “                                       |
| “                          | <i>Opisthopterus tardoore</i>                                          | Clupeidae        | “                                                | “                                       |
| <i>Nerocila trichiura</i>  | <i>Exocoetus volitans</i>                                              | Exocoetidae      | South of India,<br>10°20' S,<br>70°00 E          | Bruce and Harrison-<br>Nelson (1988)    |
| “                          | “                                                                      | “                | Parangipettai                                    | <b>Present study</b>                    |
| <i>Nerocila trivittata</i> | <i>Arius nenga</i> (= <i>Nemapteryx nenga</i> )                        | Ariidae          | Musamani<br>Lock, area of<br>the Pulicat<br>Lake | Jayadev Babu and<br>Sanjeeva Raj (1984) |
| “                          | <i>Otolithus argenteus</i><br>(= <i>Otolithes ruber</i> )              | Sciaenidae       | Trivandrum                                       | Pillai (1960)                           |
| <i>Nerocila sp.</i>        | <i>Ilisha filigera</i> , <i>I. Indica</i> (= <i>Ilisha melastoma</i> ) | Pristigasteridae | Kutch, West<br>coast of India                    | Meenakshisundaram<br>(1965)             |
| <i>Nerocila sp.</i>        | <i>Ilisha melastoma</i>                                                | Pristigasteridae | Andhra coast                                     | Seshagiri Rao (1974)                    |
| <i>Nerocila sp.</i>        | <i>Sardinella gibbosa</i> ,                                            | Clupeidae        | East coast of                                    | Ranjitsing and<br>Padmalatha (1997)     |
|                            | <i>S. albella</i>                                                      | Clupeidae        | India                                            |                                         |
| <i>Nerocila sp.</i>        | <i>Parexocoetus mento</i>                                              | Exocoetidae      | Madras coast                                     | Daniel and Rama<br>Rao, (1967)          |
